# Supplementary material for: Gut microbiota and plasma cytokine levels in patients with attention-deficit/hyperactivity disorder
Source: PubMed Central journal article supplement (PMC8866486; doi:10.1038/s41398-022-01844-x), 2022-02-23
Supplement: 41398_2022_1844_MOESM2_ESM.pdf [file 41398_2022_1844_MOESM2_ESM.pdf]

## Male

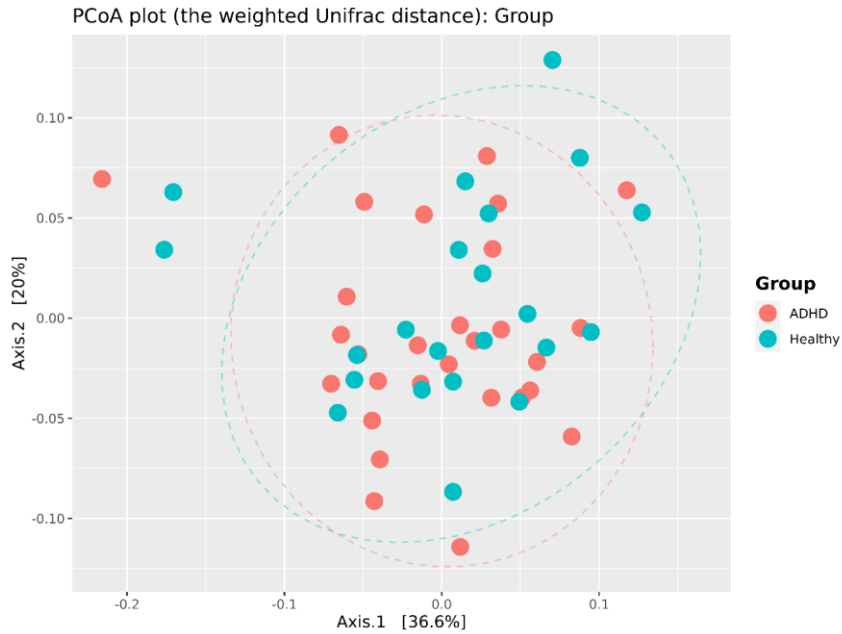

## Female

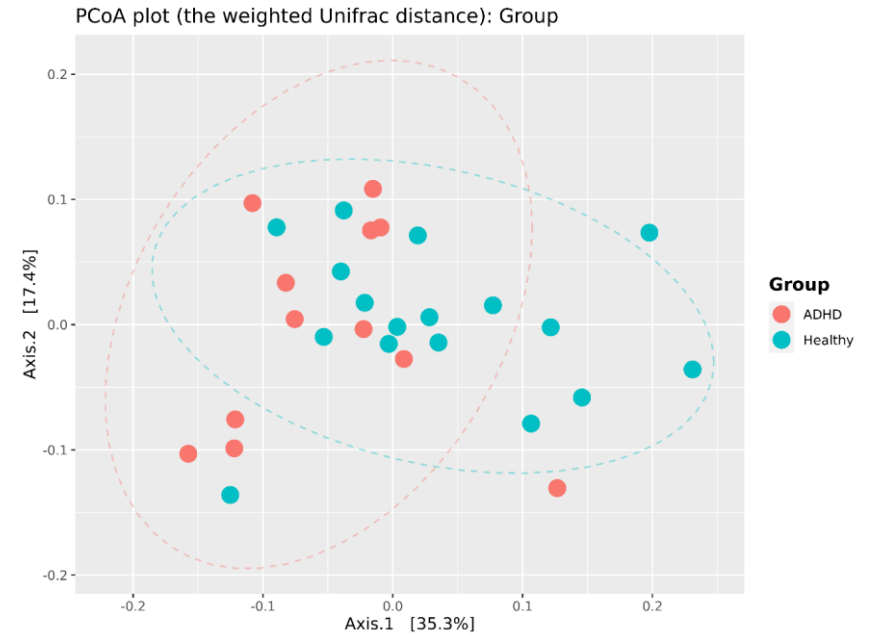

**Supplementary Fig. 2. The gut microbiome PCoA plot in male and female ADHD patients and healthy controls.**
