# Supplementary material for: Gut microbiota and plasma cytokine levels in patients with attention-deficit/hyperactivity disorder
Source: PubMed Central journal article supplement (PMC8866486; doi:10.1038/s41398-022-01844-x), 2022-02-23
Supplement: 41398_2022_1844_MOESM3_ESM.pdf [file 41398_2022_1844_MOESM3_ESM.pdf]

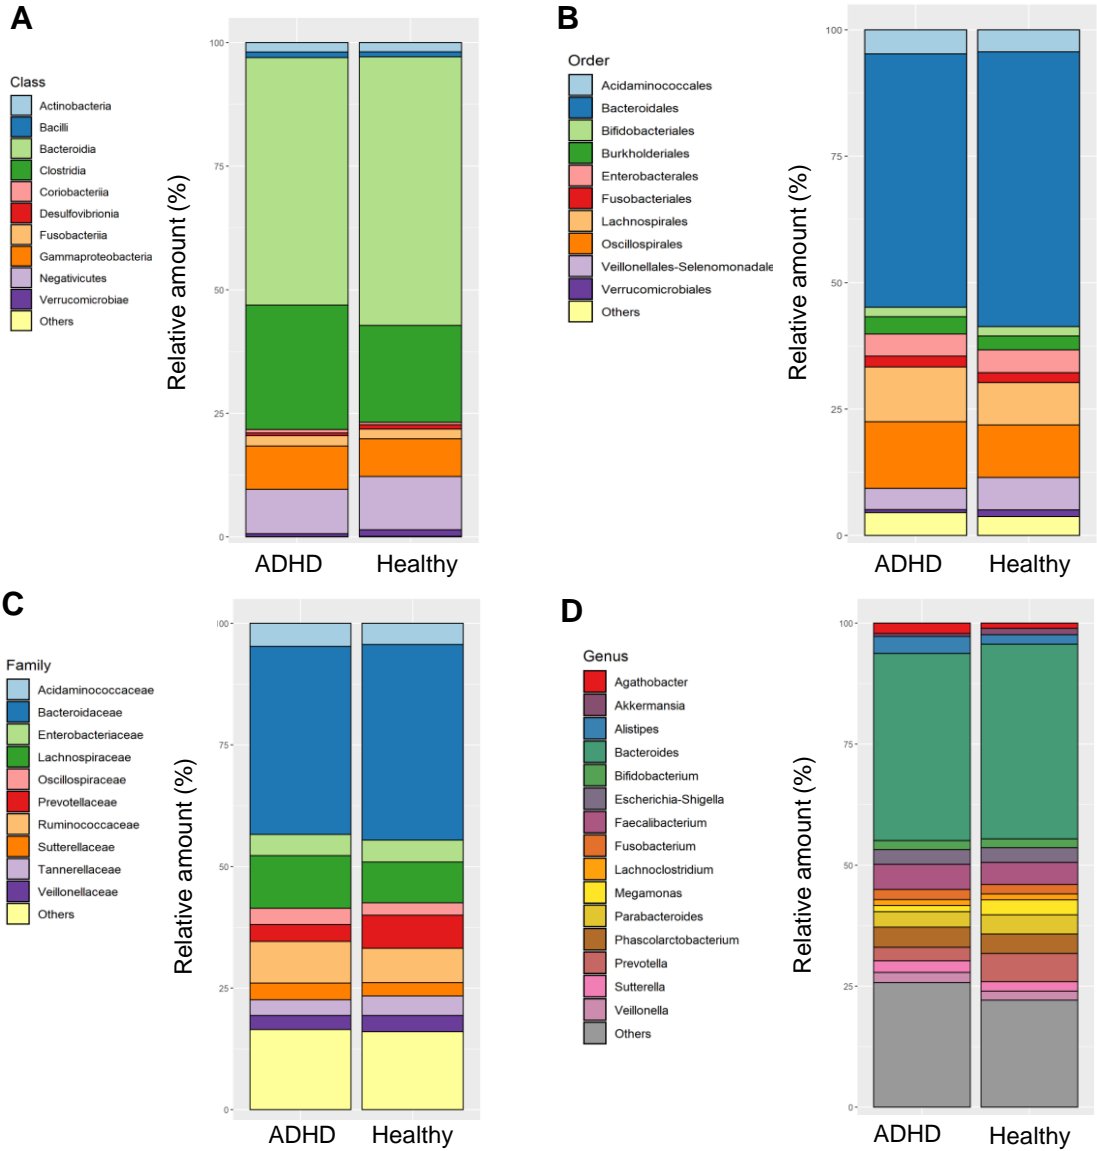

**Supplementary Fig. 3. The bacterial taxonomic distributions from class to genus levels in ADHD and healthy controls. The most abundance class, order, family and genus were *Bacteroidia*, *Bacteroidales*, *Bacteroidaceae* and *Bacteroides*, respectively.**
