# Supplementary material for: Gut microbiota and plasma cytokine levels in patients with attention-deficit/hyperactivity disorder
Source: PubMed Central journal article supplement (PMC8866486; doi:10.1038/s41398-022-01844-x), 2022-02-23
Supplement: 41398_2022_1844_MOESM5_ESM.pdf [file 41398_2022_1844_MOESM5_ESM.pdf]

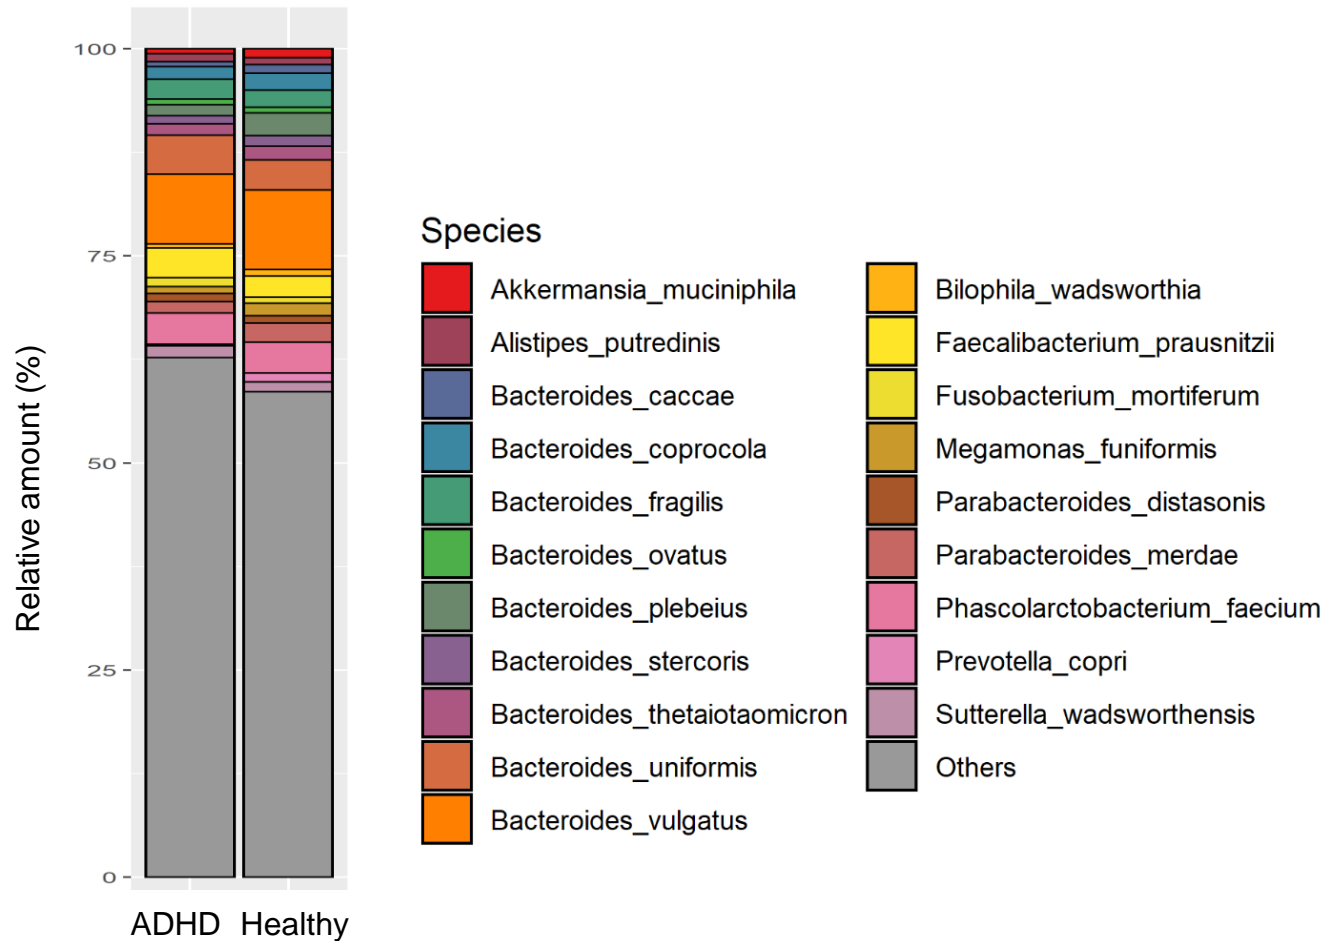

**Supplementary Fig. 5.** The bacterial taxonomic distributions in species level in ADHD and healthy controls
